# Supplementary material for: Fatty Acid Composition of Selected Street Foods Commonly Available in Malaysia
Source: MDPI journal article supplement (doi:10.3390/foods12061234), 2023-03-14
Supplement: s1 [file s1]

TABLE S4: PUFA CONTENT IN 39 STREET FOODS FROM HIGHEST TO LOWEST AMOUNT

| No. | Street Food                                                  | Food Category | Average PUFA content (%) |
|-----|--------------------------------------------------------------|---------------|--------------------------|
| 1   | <i>Apam balik</i>                                            | Desserts      | 38.8 ± 8.8               |
| 2   | <i>Apam balik</i> with cheese                                | Desserts      | 38.5 ± 1.2               |
| 3   | Takoyaki                                                     | Snacks        | 34.5 ± 1.0               |
| 4   | Pizza                                                        | Snacks        | 33.4 ± 2.1               |
| 5   | Kebab                                                        | Main meals    | 32.0 ± 1.3               |
| 6   | Fried chicken (non-meat parts)                               | Snacks        | 30.5 ± 0.7               |
| 7   | Satay                                                        | Snacks        | 30.0 ± 0.0               |
| 8   | Fried sausage                                                | Snacks        | 24.6 ± 7.3               |
| 9   | French fries                                                 | Snacks        | 22.5 ± 0.6               |
| 10  | Fried chicken with cheese                                    | Snacks        | 21.0 ± 0.0               |
| 11  | <i>Roti john</i>                                             | Main meals    | 19.0 ± 0.5               |
| 12  | <i>Kerepek</i>                                               | Snacks        | 18.0 ± 0.0               |
| 13  | Noodles with gravy (Curry / Soy sauce)                       | Main meals    | 17.7 ± 0.2               |
| 14  | Chicken burger                                               | Main meals    | 17.0 ± 0.0               |
| 15  | Chicken rice                                                 | Main meals    | 16.9 ± 1.3               |
| 16  | Chicken nuggets                                              | Snacks        | 16.9 ± 4.1               |
| 17  | Fried noodles                                                | Main meals    | 16.5 ± 3.6               |
| 18  | Banana fritters with cheese                                  | Desserts      | 16.4 ± 0.3               |
| 19  | <i>Nasi lemak</i>                                            | Main meals    | 15.8 ± 3.3               |
| 20  | <i>Keropok lekor</i>                                         | Snacks        | 15.5 ± 3.5               |
| 21  | <i>Roti canai</i> (flat bread)                               | Main meals    | 15.2 ± 0.3               |
| 22  | Fried chicken                                                | Snacks        | 14.8 ± 3.7               |
| 23  | Fried rice                                                   | Main meals    | 14.0 ± 0.0               |
| 24  | <i>Kuih keria</i>                                            | Desserts      | 14.0 ± 0.0               |
| 25  | Popcorn                                                      | Desserts      | 13.1 ± 0.5               |
| 26  | <i>Nasi lemak</i> with fried chicken                         | Main meals    | 13.0 ± 0.0               |
| 27  | Donut                                                        | Desserts      | 12.8 ± 1.1               |
| 28  | Fried fish ball                                              | Snacks        | 12.7 ± 0.3               |
| 29  | Fried vermicelli @ fried <i>mihun</i>                        | Main meals    | 12.7 ± 0.9               |
| 30  | Fried <i>popiah</i>                                          | Snacks        | 12.6 ± 0.7               |
| 31  | Curry puff                                                   | Snacks        | 12.5 ± 1.8               |
| 32  | Net crepes ( <i>Roti jala</i> )                              | Main meals    | 12.4 ± 0.6               |
| 33  | Fried <i>kuey teow</i>                                       | Main meals    | 12.0 ± 0.0               |
| 34  | Banana fritters                                              | Desserts      | 12.0 ± 0.0               |
| 35  | <i>Murtabak</i>                                              | Snacks        | 11.0 ± 0.0               |
| 36  | <i>Cakoi</i>                                                 | Snacks        | 10.1 ± 1.7               |
| 37  | <i>Kuih seri muka</i>                                        | Desserts      | 8.0 ± 0.0                |
| 38  | Glutinous rice with <i>rendang</i> (meat cooked with spices) | Main meals    | 4.8 ± 1.2                |
| 39  | <i>Kuih jelurut</i>                                          | Desserts      | 4.5 ± 0.7                |
