# Supplementary material for: Fatty Acid Composition of Selected Street Foods Commonly Available in Malaysia
Source: MDPI journal article supplement (doi:10.3390/foods12061234), 2023-03-14
Supplement: s1 [file s1]

**TABLE S1: FATTY ACID COMPOSITION IN 70 ANALYSED STREET FOODS**

Supplementary table: Individual saturated fatty acid (SFA) content (% total fat) and fat content (g/100 g food) of 70 analysed street foods by state.

| No.             | Street food sample ( <i>n</i> = 2) by state | Fat<br>(g/100 g food) | SFA            |               |                |                |               |               |
|-----------------|---------------------------------------------|-----------------------|----------------|---------------|----------------|----------------|---------------|---------------|
|                 |                                             |                       | Lauric         | Myristic      | Palmitic       | Stearic        | Myristoleic   | Capric        |
|                 |                                             |                       | C 12:0         | C 14:0        | C 16:0         | C 18:0         | C 14:1        | C 10:0        |
| SELANGOR        |                                             |                       |                |               |                |                |               |               |
| 1               | <i>Nasi lemak</i>                           | 7.8 ± 0.1             | 6.955 ± 0.375  | 3.210 ± 0.085 | 28.300 ± 0.283 | 4.075 ± 4.335  | <0.100        | 0.942 ± 0.059 |
| 2               | Pizza                                       | 8.9 ± 0.5             | 3.445 ± 0.078  | 6.005 ± 0.092 | 28.000 ± 0.000 | 7.795 ± 0.092  | 0.563 ± 0.013 | 2.050 ± 0.071 |
| 3               | Chicken nuggets                             | 19.4 ± 0.1            | 0.348 ± 0.030  | 0.948 ± 0.045 | 34.400 ± 0.424 | 4.580 ± 0.042  | <0.100        | <0.100        |
| 4               | Curry puff                                  | 15.8 ± 0.4            | 1.215 ± 0.021  | 1.300 ± 0.000 | 39.000 ± 0.141 | 3.825 ± 0.021  | <0.100        | 0.108 ± 0.002 |
| 5               | <i>Apam balik</i>                           | 7.5 ± 0.6             | 1.545 ± 0.007  | 0.798 ± 0.011 | 20.650 ± 0.071 | 3.570 ± 0.042  | <0.100        | 0.131 ± 0.016 |
| KUALA LUMPUR    |                                             |                       |                |               |                |                |               |               |
| 1               | <i>Nasi lemak</i>                           | 4.7 ± 0.1             | 12.850 ± 0.778 | 5.805 ± 0.191 | 26.300 ± 0.424 | 4.505 ± 0.064  | <0.100        | 1.665 ± 0.205 |
| 2               | Kebab                                       | 7.4 ± 0.3             | 1.260 ± 0.311  | 1.165 ± 0.120 | 26.550 ± 0.495 | 6.295 ± 0.035  | <0.100        | <0.100        |
| 3               | Takoyaki                                    | 12.7 ± 0.1            | 0.198 ± 0.002  | 0.814 ± 0.028 | 27.800 ± 0.283 | 7.060 ± 0.042  | <0.100        | <0.100        |
| 4               | Banana fritters with cheese                 | 13.9 ± 1.3            | 0.993 ± 0.039  | 1.805 ± 0.007 | 38.050 ± 0.354 | 4.025 ± 0.007  | <0.100        | 0.264 ± 0.005 |
| 5               | <i>Apam balik</i>                           | 4.6 ± 0.8             | <0.100         | <0.100        | 21.000 ± 0.283 | 3.825 ± 0.049  | <0.100        | <0.100        |
| NEGERI SEMBILAN |                                             |                       |                |               |                |                |               |               |
| 1               | <i>Roti john</i>                            | 11.9 ± 0.1            | 0.766 ± 0.063  | 0.968 ± 0.045 | 34.150 ± 0.354 | 6.645 ± 0.092  | 0.036 ± 0.008 | 0.072 ± 0.004 |
| 2               | Noodles with gravy (curry / soy sauce)      | 4.0 ± 0.0             | 12.600 ± 0.141 | 5.245 ± 0.007 | 24.650 ± 0.071 | 4.660 ± 0.014  | <0.100        | 1.670 ± 0.042 |
| 3               | <i>Nasi lemak</i>                           | 4.2 ± 0.4             | 10.600 ± 0.141 | 4.695 ± 0.007 | 25.100 ± 0.000 | 4.990 ± 0.014  | <0.100        | 1.365 ± 0.035 |
| 4               | Fried sausage                               | 9.0 ± 0.3             | 0.223 ± 0.009  | 0.860 ± 0.013 | 29.450 ± 0.354 | 5.980 ± 0.071  | 0.099 ± 0.009 | <0.100        |
| 5               | <i>Apam balik</i> with cheese               | 7.6 ± 0.4             | 1.930 ± 0.141  | 4.350 ± 0.156 | 24.850 ± 0.212 | 6.075 ± 0.021  | <0.100        | 1.285 ± 0.064 |
| MELAKA          |                                             |                       |                |               |                |                |               |               |
| 1               | <i>Nasi lemak</i>                           | 3.9 ± 0.1             | 7.830 ± 0.693  | 3.655 ± 0.191 | 27.850 ± 0.212 | 4.335 ± 0.120  | <0.100        | 1.045 ± 0.120 |
| 2               | Chicken nuggets                             | 13.6 ± 0.0            | 0.501 ± 0.063  | 0.981 ± 0.042 | 35.050 ± 0.071 | 5.245 ± 0.035  | <0.100        | <0.100        |
| 3               | French fries                                | 20.5 ± 1.3            | 0.411 ± 0.049  | 0.901 ± 0.006 | 35.000 ± 0.849 | 4.350 ± 0.042  | <0.100        | <0.100        |
| 4               | Fried sausage                               | 6.8 ± 0.0             | <0.100         | 1.275 ± 0.106 | 24.650 ± 0.071 | 10.550 ± 0.071 | <0.100        | <0.100        |
| 5               | <i>Apam balik</i>                           | 6.8 ± 0.4             | 4.070 ± 0.127  | 1.725 ± 0.049 | 22.700 ± 0.141 | 3.495 ± 0.035  | <0.100        | 0.373 ± 0.025 |
| PERAK           |                                             |                       |                |               |                |                |               |               |
| 1               | <i>Roti canai</i> (flat bread)              | 3.9 ± 0.0             | <0.100         | <0.100        | 2.350 ± 1.202  | 0.250 ± 0.071  | <0.100        | <0.100        |
| 2               | Net crepes ( <i>Roti jala</i> )             | 9.8 ± 0.5             | 0.850 ± 0.071  | 0.350 ± 0.071 | 3.300 ± 0.141  | 0.350 ± 0.071  | <0.100        | <0.100        |

|            |                                                              |            |                |               |                |               |               |               |
|------------|--------------------------------------------------------------|------------|----------------|---------------|----------------|---------------|---------------|---------------|
| 3          | Fried <i>popiah</i>                                          | 14.3 ± 0.3 | <0.100         | 0.200 ± 0.000 | 5.900 ± 0.000  | 0.500 ± 0.000 | <0.100        | <0.100        |
| 4          | <i>Kerepek</i>                                               | 43.1 ± 0.5 | 0.500 ± 0.000  | 0.500 ± 0.000 | 14.400 ± 0.141 | 1.550 ± 0.071 | <0.100        | <0.100        |
| 5          | Popcorn                                                      | 31.9 ± 0.6 | 6.000 ± 0.0424 | 1.650 ± 0.071 | 8.450 ± 0.071  | 1.100 ± 0.000 | <0.100        | 0.650 ± 0.071 |
| PENANG     |                                                              |            |                |               |                |               |               |               |
| 1          | <i>Nasi lemak</i>                                            | 4.4 ± 0.4  | 0.100 ± 0.000  | <0.100        | 1.400 ± 0.141  | 0.200 ± 0.000 | <0.100        | <0.100        |
| 2          | Noodles with gravy (curry / soy sauce)                       | 4.0 ± 0.0  | 0.500 ± 0.000  | 0.200 ± 0.000 | 1.100 ± 0.000  | 0.200 ± 0.000 | <0.100        | <0.100        |
| 3          | Fried noodles                                                | 3.2 ± 0.2  | <0.100         | <0.100        | 1.150 ± 0.071  | 0.100 ± 0.000 | <0.100        | <0.100        |
| 4          | <i>Cakoi</i>                                                 | 25.4 ± 0.6 | 7.800 ± 0.141  | 3.250 ± 0.071 | <0.100         | 1.200 ± 0.000 | <0.100        | 1.000 ± 0.000 |
| 5          | Curry puff                                                   | 15.9 ± 0.2 | 0.100 ± 0.000  | 0.200 ± 0.000 | 6.300 ± 0.141  | 0.700 ± 0.000 | <0.100        | <0.100        |
| KEDAH      |                                                              |            |                |               |                |               |               |               |
| 1          | <i>Nasi lemak</i>                                            | 4.0 ± 0.2  | 2.705 ± 0.049  | 1.890 ± 0.028 | 35.500 ± 0.707 | 5.000 ± 0.000 | <0.100        | 0.375 ± 0.007 |
| 2          | Chicken nuggets                                              | 23.0 ± 0.1 | 0.210 ± 0.014  | 0.840 ± 0.028 | 36.500 ± 0.707 | 4.600 ± 0.000 | <0.100        | <0.100        |
| 3          | Fried sausage                                                | 12.6 ± 0.1 | 0.205 ± 0.007  | 0.900 ± 0.000 | 34.000 ± 0.000 | 5.000 ± 0.000 | <0.100        | <0.100        |
| 4          | Curry puff                                                   | 17.3 ± 0.1 | 0.900 ± 0.000  | 1.095 ± 0.134 | 41.000 ± 0.000 | 4.060 ± 0.085 | <0.100        | <0.100        |
| 5          | Donut                                                        | 17.6 ± 0.2 | 0.285 ± 0.007  | 0.900 ± 0.000 | 40.000 ± 0.000 | 4.000 ± 0.000 | <0.100        | <0.100        |
| PERLIS     |                                                              |            |                |               |                |               |               |               |
| 1          | Chicken rice                                                 | 2.3 ± 0.1  | <0.100         | <0.100        | 0.800 ± 0.000  | 0.100 ± 0.000 | <0.100        | <0.100        |
| 2          | Fried chicken                                                | 14.4 ± 0.4 | <0.100         | 0.100 ± 0.000 | 5.000 ± 0.000  | 0.725 ± 0.035 | <0.100        | <0.100        |
| 3          | Chicken nuggets                                              | 24.7 ± 0.8 | <0.100         | 0.200 ± 0.000 | 9.300 ± 0.283  | 1.050 ± 0.071 | <0.100        | <0.100        |
| 4          | Takoyaki                                                     | 10.8 ± 0.3 | <0.100         | <0.100        | 2.850 ± 0.071  | 0.500 ± 0.000 | <0.100        | <0.100        |
| 5          | Fried fish ball                                              | 7.9 ± 0.2  | <0.100         | 0.100 ± 0.000 | 2.850 ± 0.071  | 0.400 ± 0.000 | <0.100        | <0.100        |
| KELANTAN   |                                                              |            |                |               |                |               |               |               |
| 1          | Fried vermicelli @ fried <i>mihun</i>                        | 3.2 ± 0.2  | <0.100         | <0.100        | 1.150 ± 0.071  | 0.150 ± 0.071 | <0.100        | <0.100        |
| 2          | <i>Nasi lemak</i>                                            | 4.7 ± 0.2  | 0.450 ± 0.071  | 0.200 ± 0.000 | 1.250 ± 0.071  | 0.200 ± 0.000 | <0.100        | <0.100        |
| 3          | Glutinous rice with <i>rendang</i> (meat cooked with spices) | 5.2 ± 0.2  | 1.850 ± 0.071  | 0.850 ± 0.071 | 0.800 ± 0.000  | 0.200 ± 0.000 | <0.100        | 0.200 ± 0.000 |
| 4          | <i>Cakoi</i>                                                 | 20.5 ± 0.8 | 0.100 ± 0.000  | 0.200 ± 0.000 | 8.200 ± 0.283  | 0.850 ± 0.071 | <0.100        | <0.100        |
| 5          | Curry puff                                                   | 11.1 ± 0.1 | <0.100         | <0.100        | 4.350 ± 0.071  | 0.500 ± 0.000 | <0.100        | <0.100        |
| TERENGGANU |                                                              |            |                |               |                |               |               |               |
| 1          | <i>Nasi lemak</i>                                            | 3.3 ± 0.1  | 20.000 ± 0.000 | 9.000 ± 0.000 | 20.000 ± 0.000 | 4.000 ± 0.000 | <0.100        | 3.000 ± 0.000 |
| 2          | Fried noodles                                                | 5.4 ± 0.1  | 0.265 ± 0.007  | 1.075 ± 0.007 | 40.000 ± 0.000 | 4.000 ± 0.000 | <0.100        | <0.100        |
| 3          | Fried chicken                                                | 11.1 ± 0.2 | 0.260 ± 0.028  | 1.020 ± 0.028 | 34.500 ± 0.707 | 4.750 ± 0.354 | 0.140 ± 0.014 | <0.100        |
| 4          | Chicken nuggets                                              | 12.4 ± 0.1 | 0.280 ± 0.000  | 1.000 ± 0.000 | 38.000 ± 0.000 | 4.000 ± 0.000 | <0.100        | <0.100        |
| 5          | Donut                                                        | 13.8 ± 0.0 | 2.000 ± 0.000  | 2.000 ± 0.000 | 41.000 ± 0.000 | 4.000 ± 0.000 | <0.100        | 0.145 ± 0.007 |
| PAHANG     |                                                              |            |                |               |                |               |               |               |

|                |                                      |            |                |                |                 |                |               |               |
|----------------|--------------------------------------|------------|----------------|----------------|-----------------|----------------|---------------|---------------|
| 1              | Chicken rice                         | 3.2 ± 0.0  | 1.660 ± 0.014  | 0.815 ± 0.926  | 35.500 ± 0.707  | 5.000 ± 0.000  | <0.100        | 0.160 ± 0.000 |
| 2              | <i>Nasi lemak</i>                    | 4.6 ± 0.0  | 6.500 ± 0.707  | 3.000 ± 0.000  | 30.000 ± 0.000  | 5.000 ± 0.000  | <0.100        | 0.855 ± 0.021 |
| 3              | Fried chicken                        | 17.5 ± 0.5 | 0.195 ± 0.007  | 0.985 ± 0.021  | 41.000 ± 0.000  | 4.150 ± 0.212  | <0.100        | <0.100        |
| 4              | Curry puff                           | 11.6 ± 0.2 | 0.745 ± 0.035  | 1.000 ± 0.000  | 41.000 ± 0.000  | 4.000 ± 0.000  | <0.100        | <0.100        |
| 5              | Takoyaki                             | 14.7 ± 0.0 | 0.190 ± 0.000  | 0.625 ± 0.035  | 25.500 ± 0.0707 | 5.100 ± 0.141  | <0.100        | <0.100        |
| <b>JOHOR</b>   |                                      |            |                |                |                 |                |               |               |
| 1              | <i>Nasi lemak</i> with fried chicken | 7.9 ± 0.0  | 13.000 ± 0.000 | 6.000 ± 0.000  | 27.000 ± 0.000  | 4.000 ± 0.000  | <0.100        | 2.000 ± 0.000 |
| 2              | Fried <i>kuey teow</i>               | 6.5 ± 0.6  | 0.165 ± 0.007  | 0.880 ± 0.000  | 38.000 ± 0.000  | 4.000 ± 0.000  | <0.100        | <0.100        |
| 3              | Fried chicken with cheese            | 17.2 ± 0.4 | 0.440 ± 0.000  | 0.900 ± 0.000  | 31.000 ± 0.000  | 5.000 ± 0.000  | <0.100        | <0.100        |
| 4              | <i>Keropok lekor</i>                 | 7.4 ± 0.1  | 0.405 ± 0.007  | 2.000 ± 0.000  | 20.000 ± 26.870 | 5.000 ± 0.000  | <0.100        | <0.100        |
| 5              | <i>Kuih seri muka</i>                | 4.2 ± 0.1  | 30.500 ± 0.707 | 10.000 ± 0.000 | 20.000 ± 0.000  | 4.000 ± 0.000  | <0.100        | 4.000 ± 0.000 |
| <b>SABAH</b>   |                                      |            |                |                |                 |                |               |               |
| 1              | <i>Murtabak</i>                      | 11.7 ± 0.4 | 0.205 ± 0.007  | 0.900 ± 0.000  | 40.000 ± 0.000  | 5.000 ± 0.000  | <0.100        | <0.100        |
| 2              | <i>Keropok lekor</i>                 | 10.3 ± 0.6 | 0.460 ± 0.000  | 2.000 ± 0.000  | 38.000 ± 0.000  | 5.000 ± 0.000  | <0.100        | <0.100        |
| 3              | Fried chicken (non-meat parts)       | 3.9 ± 0.3  | 0.340 ± 0.014  | 0.610 ± 0.000  | 27.000 ± 0.000  | 10.000 ± 0.000 | <0.100        | <0.100        |
| 4              | Satay                                | 6.1 ± 0.1  | 0.195 ± 0.021  | 0.650 ± 0.000  | 24.000 ± 0.000  | 10.000 ± 0.000 | 0.115 ± 0.007 | <0.100        |
| 5              | <i>Kuih jelurut</i>                  | 2.5 ± 0.1  | 40.000 ± 0.000 | 20.000 ± 0.000 | 10.000 ± 0.000  | 3.285 ± 0.000  | <0.100        | 6.000 ± 0.000 |
| <b>SARAWAK</b> |                                      |            |                |                |                 |                |               |               |
| 1              | Chicken burger                       | 9.8 ± 0.3  | 0.160 ± 0.000  | 1.015 ± 0.021  | 35.000 ± 0.000  | 8.000 ± 0.000  | 0.155 ± 0.007 | <0.100        |
| 2              | <i>Roti canai</i> (flat bread)       | 11.0 ± 0.4 | 1.000 ± 0.000  | 1.000 ± 0.000  | 41.000 ± 0.000  | 4.000 ± 0.000  | <0.100        | <0.100        |
| 3              | Fried rice                           | 4.9 ± 0.1  | 0.165 ± 0.007  | 0.865 ± 0.007  | 36.000 ± 0.000  | 5.000 ± 0.000  | <0.100        | <0.100        |
| 4              | Banana fritters                      | 8.5 ± 0.4  | 2.000 ± 0.000  | 2.000 ± 0.000  | 38.000 ± 0.000  | 4.000 ± 0.000  | <0.100        | 0.195 ± 0.007 |
| 5              | <i>Kuih keria</i>                    | 15.3 ± 0.4 | 0.330 ± 0.000  | 1.000 ± 0.000  | 40.000 ± 0.000  | 4.000 ± 0.000  | <0.100        | <0.100        |

Data represent average of two independent readings ± standard deviation; SFA – Saturated fatty acid.

Supplementary table: Individual monounsaturated fatty acid (MUFA) and polyunsaturated fatty acid (PUFA) contents (% total fat) of 70 analysed street foods by state.

| No.             | Street food sample ( <i>n</i> = 2) by state | MUFA          |                | PUFA           |               |               |               |
|-----------------|---------------------------------------------|---------------|----------------|----------------|---------------|---------------|---------------|
|                 |                                             | Palmitoleic   | Oleic          | Linoleic       | Linolenic     | Arachidic     | Arachidonic   |
|                 |                                             | C 16:1        | C 18:1         | C 18:2         | C 18:3        | C 20:0        | C 20:4        |
| SELANGOR        |                                             |               |                |                |               |               |               |
| 1               | <i>Nasi lemak</i>                           | 1.285 ± 0.007 | 29.300 ± 0.141 | 16.400 ± 0.000 | 0.645 ± 0.021 | 0.190 ± 0.010 | 2.495 ± 0.106 |
| 2               | Pizza                                       | 0.918 ± 0.023 | 14.950 ± 0.071 | 28.950 ± 0.071 | 1.905 ± 0.078 | <0.100        | <0.100        |
| 3               | Chicken nuggets                             | 1.515 ± 0.049 | 37.200 ± 0.141 | 18.550 ± 0.071 | <0.100        | 0.210 ± 0.003 | 0.725 ± 0.012 |
| 4               | Curry puff                                  | 0.279 ± 0.010 | 38.050 ± 0.071 | 14.950 ± 0.071 | 0.581 ± 0.012 | 0.279 ± 0.006 | <0.100        |
| 5               | <i>Apam balik</i>                           | 0.156 ± 0.006 | 34.250 ± 0.071 | 34.850 ± 0.071 | 0.674 ± 0.037 | 0.840 ± 0.034 | <0.100        |
| KUALA LUMPUR    |                                             |               |                |                |               |               |               |
| 1               | <i>Nasi lemak</i>                           | 0.632 ± 0.097 | 32.200 ± 0.283 | 13.050 ± 0.354 | <0.100        | <0.100        | <0.100        |
| 2               | Kebab                                       | 2.020 ± 0.141 | 30.750 ± 0.778 | 28.800 ± 0.566 | 2.335 ± 0.205 | <0.100        | 0.792 ± 0.047 |
| 3               | Takoyaki                                    | 0.744 ± 0.019 | 27.600 ± 0.000 | 26.750 ± 0.071 | 2.135 ± 0.021 | 0.295 ± 0.021 | 1.820 ± 0.071 |
| 4               | Banana fritters with cheese                 | 0.283 ± 0.018 | 37.500 ± 0.283 | 14.550 ± 0.071 | 1.250 ± 0.014 | 0.289 ± 0.007 | <0.100        |
| 5               | <i>Apam balik</i>                           | <0.100        | 25.200 ± 0.000 | 46.950 ± 0.354 | 1.840 ± 0.085 | <0.100        | <0.100        |
| NEGERI SEMBILAN |                                             |               |                |                |               |               |               |
| 1               | <i>Roti john</i>                            | 1.215 ± 0.035 | 35.100 ± 0.283 | 17.300 ± 0.141 | 0.808 ± 0.013 | 0.216 ± 0.011 | 1.235 ± 0.035 |
| 2               | Noodles with gravy (curry / soy sauce)      | 0.780 ± 0.005 | 29.350 ± 0.212 | 16.400 ± 0.000 | 1.145 ± 0.021 | 0.193 ± 0.008 | 0.625 ± 0.018 |
| 3               | <i>Nasi lemak</i>                           | 1.105 ± 0.007 | 31.400 ± 0.000 | 16.100 ± 0.000 | 0.395 ± 0.002 | 0.398 ± 0.017 | 0.613 ± 0.008 |
| 4               | Fried sausage                               | 2.660 ± 0.028 | 35.100 ± 0.141 | 21.400 ± 0.000 | 1.290 ± 0.028 | 0.179 ± 0.013 | 1.415 ± 0.007 |
| 5               | <i>Apam balik</i> with cheese               | <0.100        | 20.750 ± 0.071 | 35.850 ± 0.071 | 1.790 ± 0.028 | <0.100        | <0.100        |
| MELAKA          |                                             |               |                |                |               |               |               |
| 1               | <i>Nasi lemak</i>                           | 0.607 ± 0.042 | 34.200 ± 0.707 | 16.700 ± 0.283 | 0.460 ± 0.011 | 0.501 ± 0.015 | 0.180 ± 0.011 |
| 2               | Chicken nuggets                             | 0.923 ± 0.036 | 35.050 ± 0.212 | 19.800 ± 0.000 | 0.971 ± 0.070 | <0.100        | 1.335 ± 0.148 |
| 3               | French fries                                | <0.100        | 37.100 ± 0.283 | 19.700 ± 0.283 | 2.555 ± 0.290 | <0.100        | <0.100        |
| 4               | Fried sausage                               | 3.370 ± 0.028 | 27.400 ± 0.000 | 22.950 ± 0.071 | 1.495 ± 0.049 | <0.100        | 5.940 ± 0.071 |
| 5               | <i>Apam balik</i>                           | 0.160 ± 0.039 | 33.050 ± 0.212 | 30.800 ± 0.141 | 0.665 ± 0.242 | <0.100        | <0.100        |
| PERAK           |                                             |               |                |                |               |               |               |
| 1               | <i>Roti canai</i> (flat bread)              | <0.100        | 1.400 ± 0.000  | 0.600 ± 0.000  | <0.100        | <0.100        | <0.100        |
| 2               | Net crepes ( <i>Roti jala</i> )             | <0.100        | 3.300 ± 0.283  | 1.150 ± 0.071  | <0.100        | <0.100        | <0.100        |

|            |                                                              |               |                |                |               |               |               |
|------------|--------------------------------------------------------------|---------------|----------------|----------------|---------------|---------------|---------------|
| 3          | Fried <i>popiah</i>                                          | <0.100        | 5.700 ± 0.141  | 1.750 ± 0.071  | <0.100        | <0.100        | <0.100        |
| 4          | <i>Kerepek</i>                                               | <0.100        | 17.250 ± 0.212 | 7.650 ± 0.071  | <0.100        | 0.200 ± 0.000 | <0.100        |
| 5          | Popcorn                                                      | <0.100        | 8.750 ± 0.071  | 3.850 ± 0.071  | 0.200 ± 0.000 | <0.100        | <0.100        |
| PENANG     |                                                              |               |                |                |               |               |               |
| 1          | <i>Nasi lemak</i>                                            | <0.100        | 1.700 ± 0.141  | 0.550 ± 0.071  | <0.100        | <0.100        | <0.100        |
| 2          | Noodles with gravy (curry / soy sauce)                       | <0.100        | 1.200 ± 0.000  | 0.600 ± 0.000  | <0.100        | <0.100        | <0.100        |
| 3          | Fried noodles                                                | <0.100        | 1.250 ± 0.071  | 0.600 ± 0.000  | <0.100        | <0.100        | <0.100        |
| 4          | <i>Cakoi</i>                                                 | <0.100        | 8.400 ± 0.283  | 2.150 ± 0.071  | <0.100        | <0.100        | <0.100        |
| 5          | Curry puff                                                   | <0.100        | 6.550 ± 0.071  | 1.800 ± 0.000  | <0.100        | <0.100        | <0.100        |
| KEDAH      |                                                              |               |                |                |               |               |               |
| 1          | <i>Nasi lemak</i>                                            | 0.860 ± 0.000 | 39.000 ± 0.000 | 10.000 ± 0.000 | 0.370 ± 0.000 | 0.340 ± 0.014 | 0.325 ± 0.021 |
| 2          | Chicken nuggets                                              | 1.200 ± 0.000 | 41.500 ± 0.707 | 14.000 ± 0.000 | 0.585 ± 0.021 | 0.325 ± 0.007 | <0.100        |
| 3          | Fried sausage                                                | 1.000 ± 0.000 | 40.000 ± 0.000 | 16.000 ± 0.000 | 0.680 ± 0.014 | 0.285 ± 0.007 | 0.240 ± 0.000 |
| 4          | Curry puff                                                   | 0.200 ± 0.000 | 41.000 ± 0.000 | 10.500 ± 0.707 | 0.245 ± 0.035 | 0.360 ± 0.000 | <0.100        |
| 5          | Donut                                                        | 0.200 ± 0.000 | 42.000 ± 0.000 | 12.000 ± 0.000 | <0.100        | 0.355 ± 0.007 | <0.100        |
| PERLIS     |                                                              |               |                |                |               |               |               |
| 1          | Chicken rice                                                 | <0.100        | 0.850 ± 0.071  | 0.300 ± 0.000  | <0.100        | <0.100        | <0.100        |
| 2          | Fried chicken                                                | 0.200 ± 0.000 | 5.550 ± 0.212  | 2.300 ± 0.141  | 0.100 ± 0.000 | <0.100        | 0.100 ± 0.000 |
| 3          | Chicken nuggets                                              | 0.100 ± 0.000 | 10.350 ± 0.354 | 3.200 ± 0.141  | <0.100        | <0.100        | <0.100        |
| 4          | Takoyaki                                                     | <0.100        | 3.550 ± 0.071  | 3.200 ± 0.141  | 0.300 ± 0.000 | <0.100        | <0.100        |
| 5          | Fried fish ball                                              | <0.100        | 3.150 ± 0.071  | 0.900 ± 0.000  | <0.100        | <0.100        | <0.100        |
| KELANTAN   |                                                              |               |                |                |               |               |               |
| 1          | Fried vermicelli @ fried <i>mihun</i>                        | <0.100        | 1.350 ± 0.071  | 0.400 ± 0.000  | <0.100        | <0.100        | <0.100        |
| 2          | <i>Nasi lemak</i>                                            | <0.100        | 1.600 ± 0.000  | 0.600 ± 0.000  | <0.100        | <0.100        | <0.100        |
| 3          | Glutinous rice with <i>rendang</i> (meat cooked with spices) | <0.100        | 0.600 ± 0.000  | 0.200 ± 0.000  | <0.100        | <0.100        | <0.100        |
| 4          | <i>Cakoi</i>                                                 | <0.100        | 8.450 ± 0.354  | 2.250 ± 0.071  | <0.100        | <0.100        | <0.100        |
| 5          | Curry puff                                                   | <0.100        | 4.650 ± 0.071  | 1.300 ± 0.000  | <0.100        | <0.100        | <0.100        |
| TERENGGANU |                                                              |               |                |                |               |               |               |
| 1          | <i>Nasi lemak</i>                                            | 0.560 ± 0.014 | 20.000 ± 0.000 | 8.000 ± 0.000  | 0.305 ± 0.021 | 0.295 ± 0.007 | 0.255 ± 0.007 |
| 2          | Fried noodles                                                | 0.405 ± 0.021 | 40.000 ± 0.000 | 10.000± 0.000  | 0.465 ± 0.007 | 0.345 ± 0.007 | <0.100        |
| 3          | Fried chicken                                                | 3.050 ± 0.071 | 40.500 ± 0.707 | 13.000 ± 0.000 | 0.495 ± 0.007 | 0.235 ± 0.007 | 0.270 ± 0.168 |
| 4          | Chicken nuggets                                              | 1.000 ± 0.000 | 40.000 ± 0.000 | 13.000 ± 0.000 | 0.435 ± 0.007 | 0.275 ± 0.007 | 0.185 ± 0.007 |
| 5          | Donut                                                        | 0.295 ± 0.007 | 37.000 ± 0.000 | 13.000 ± 0.000 | 0.315 ± 0.092 | 0.250 ± 0.000 | <0.100        |
| PAHANG     |                                                              |               |                |                |               |               |               |

|                |                                      |               |                |                |               |               |                |
|----------------|--------------------------------------|---------------|----------------|----------------|---------------|---------------|----------------|
| 1              | Chicken rice                         | 1.515 ± 0.021 | 38.000 ± 0.000 | 10.000 ± 0.000 | 0.735 ± 0.021 | 0.280 ± 0.028 | 0.320 ± 0.000  |
| 2              | <i>Nasi lemak</i>                    | 0.700 ± 0.000 | 35.000 ± 0.000 | 10.000 ± 0.000 | 0.455 ± 0.007 | 0.385 ± 0.007 | 0.270 ± 0.000  |
| 3              | Fried chicken                        | 0.405 ± 0.007 | 41.000 ± 0.000 | 11.000 ± 0.000 | 0.235 ± 0.007 | 0.335 ± 0.007 | 0.225 ± 0.007  |
| 4              | Curry puff                           | 0.250 ± 0.000 | 40.000 ± 0.000 | 12.000 ± 0.000 | 0.310 ± 0.000 | 0.335 ± 0.007 | <0.100         |
| 5              | Takoyaki                             | 0.520 ± 0.014 | 32.000 ± 0.000 | 31.000 ± 0.000 | 3.150 ± 0.212 | 0.335 ± 0.007 | 0.165 ± 0.007  |
| <b>JOHOR</b>   |                                      |               |                |                |               |               |                |
| 1              | <i>Nasi lemak</i> with fried chicken | 0.855 ± 0.007 | 31.500 ± 0.707 | 10.000 ± 0.000 | 0.320 ± 0.000 | 0.360 ± 0.000 | 0.210 ± 0.000  |
| 2              | Fried <i>kuey teow</i>               | 0.530 ± 0.000 | 42.000 ± 0.000 | 10.000 ± 0.000 | 0.355 ± 0.007 | 0.360 ± 0.000 | 0.135 ± 0.007  |
| 3              | Fried chicken with cheese            | 2.000 ± 0.000 | 39.000 ± 0.000 | 18.000 ± 0.000 | 1.000 ± 0.000 | 0.315 ± 0.021 | 0.330 ± 0.000  |
| 4              | <i>Keropok lekor</i>                 | 1.000 ± 0.000 | 38.000 ± 0.000 | 9.000 ± 0.000  | 0.215 ± 0.007 | 0.420 ± 0.000 | 0.385 ± 0.007  |
| 5              | <i>Kuih seri muka</i>                | 0.475 ± 0.021 | 20.000 ± 0.000 | 7.000 ± 0.000  | 0.260 ± 0.000 | 0.170 ± 0.000 | 0.265 ± 0.007  |
| <b>SABAH</b>   |                                      |               |                |                |               |               |                |
| 1              | <i>Murtabak</i>                      | 0.315 ± 0.007 | 42.000 ± 0.000 | 11.000 ± 0.000 | 0.345 ± 0.035 | 0.400 ± 0.028 | <0.100         |
| 2              | <i>Keropok lekor</i>                 | 0.620 ± 0.014 | 36.000 ± 0.000 | 10.000 ± 0.000 | 0.395 ± 0.007 | 0.315 ± 0.007 | 0.600 ± 0.014  |
| 3              | Fried chicken (non-meat parts)       | 1.035 ± 0.007 | 21.500 ± 2.121 | 20.000 ± 0.000 | 0.445 ± 0.021 | 0.275 ± 0.007 | 10.000 ± 0.000 |
| 4              | Satay                                | 3.000 ± 0.000 | 30.000 ± 0.000 | 20.000 ± 0.000 | 1.050 ± 0.042 | 0.215 ± 0.035 | 6.000 ± 0.000  |
| 5              | <i>Kuih jelurut</i>                  | <0.100        | 6.500 ± 0.707  | 4.315 ± 0.092  | 0.185 ± 0.007 | <0.100        | <0.100         |
| <b>SARAWAK</b> |                                      |               |                |                |               |               |                |
| 1              | Chicken burger                       | 2.000 ± 0.000 | 36.000 ± 0.000 | 15.000 ± 0.000 | 0.850 ± 0.014 | 0.215 ± 0.007 | 0.930 ± 0.000  |
| 2              | <i>Roti canai</i> (flat bread)       | 0.195 ± 0.007 | 36.000 ± 0.000 | 14.000 ± 0.000 | 0.440 ± 0.028 | 0.310 ± 0.000 | <0.100         |
| 3              | Fried rice                           | 6.825 ± 7.884 | 41.000 ± 0.000 | 10.000 ± 0.000 | 0.370 ± 0.028 | 0.325 ± 0.007 | 0.265 ± 0.007  |
| 4              | Banana fritters                      | 0.215 ± 0.007 | 40.000 ± 0.000 | 11.000 ± 1.414 | 0.670 ± 0.000 | 0.350 ± 0.000 | <0.100         |
| 5              | <i>Kuih keria</i>                    | 0.190 ± 0.000 | 40.000 ± 0.000 | 13.000 ± 0.000 | 0.450 ± 0.014 | 0.320 ± 0.000 | <0.100         |

Data represent average of two independent readings ± standard deviation; MUFA – Monounsaturated fatty acid; PUFA – Polyunsaturated fatty acid.
