# Supplementary material for: Fatty Acid Composition of Selected Street Foods Commonly Available in Malaysia
Source: MDPI journal article supplement (doi:10.3390/foods12061234), 2023-03-14
Supplement: s1 [file s1]

**TABLE S3: MUFA CONTENT IN 39 STREET FOODS FROM HIGHEST TO LOWEST AMOUNT**

| No. | Street Food                                                  | Food Category | Average MUFA content (%) |
|-----|--------------------------------------------------------------|---------------|--------------------------|
| 1   | Fried vermicelli @ fried <i>mihun</i>                        | Main meals    | 44.4 ± 1.5               |
| 2   | Fried <i>kuey teow</i>                                       | Main meals    | 43.0 ± 0.0               |
| 3   | <i>Murtabak</i>                                              | Snacks        | 43.0 ± 0.0               |
| 4   | Fried rice                                                   | Main meals    | 43.0 ± 0.0               |
| 5   | Fried chicken                                                | Snacks        | 42.2 ± 1.7               |
| 6   | Curry puff                                                   | Snacks        | 41.0 ± 2.0               |
| 7   | Fried chicken with cheese                                    | Snacks        | 41.0 ± 0.0               |
| 8   | Banana fritters                                              | Desserts      | 41.0 ± 0.0               |
| 9   | <i>Kuih keria</i>                                            | Desserts      | 41.0 ± 0.0               |
| 10  | <i>Kerepek</i>                                               | Snacks        | 40.9 ± 0.2               |
| 11  | Fried noodles                                                | Main meals    | 40.6 ± 0.9               |
| 12  | Fried <i>popiah</i>                                          | Snacks        | 40.6 ± 0.2               |
| 13  | Chicken nuggets                                              | Snacks        | 40.4 ± 2.8               |
| 14  | Fried fish ball                                              | Snacks        | 40.1 ± 0.2               |
| 15  | Donut                                                        | Desserts      | 40.0 ± 2.8               |
| 16  | Chicken rice                                                 | Main meals    | 39.5 ± 0.7               |
| 17  | Chicken burger                                               | Main meals    | 39.0 ± 0.0               |
| 18  | Banana fritters with cheese                                  | Desserts      | 38.3 ± 0.4               |
| 19  | <i>Keropok lekor</i>                                         | Snacks        | 38.3 ± 2.5               |
| 20  | <i>Roti john</i>                                             | Main meals    | 37.9 ± 0.2               |
| 21  | <i>Roti canai</i> (flat bread)                               | Main meals    | 37.8 ± 0.0               |
| 22  | <i>Cakoi</i>                                                 | Snacks        | 37.6 ± 5.9               |
| 23  | French fries                                                 | Snacks        | 37.3 ± 0.4               |
| 24  | Fried sausage                                                | Snacks        | 37.3 ± 5.3               |
| 25  | <i>Nasi lemak</i>                                            | Main meals    | 34.7 ± 6.0               |
| 26  | Net crepes ( <i>Roti jala</i> )                              | Main meals    | 34.3 ± 1.9               |
| 27  | Satay                                                        | Snacks        | 33.0 ± 0.0               |
| 28  | Kebab                                                        | Main meals    | 32.7 ± 0.4               |
| 29  | <i>Nasi lemak</i> with fried chicken                         | Main meals    | 32.5 ± 0.7               |
| 30  | Noodles with gravy (Curry / Soy sauce)                       | Main meals    | 32.4 ± 0.2               |
| 31  | Takoyaki                                                     | Snacks        | 32.0 ± 2.9               |
| 32  | <i>Apam balik</i>                                            | Desserts      | 32.0 ± 5.9               |
| 33  | Popcorn                                                      | Desserts      | 27.5 ± 0.8               |
| 34  | Fried chicken (non-meat parts)                               | Snacks        | 25.5 ± 0.7               |
| 35  | <i>Apam balik</i> with cheese                                | Desserts      | 21.9 ± 1.0               |
| 36  | <i>Kuih seri muka</i>                                        | Desserts      | 18.5 ± 0.7               |
| 37  | Pizza                                                        | Snacks        | 15.6 ± 1.3               |
| 38  | Glutinous rice with <i>rendang</i> (meat cooked with spices) | Main meals    | 11.7 ± 0.5               |
| 39  | <i>Kuih jelurut</i>                                          | Desserts      | 7.0 ± 0.0                |
