# Supplementary material for: Fatty Acid Composition of Selected Street Foods Commonly Available in Malaysia
Source: Foods. 2023 Mar 14;12(6):1234. doi: 10.3390/foods12061234 (PMC10048182; doi:10.3390/foods12061234)
Supplement: Supplementary file 1 [file foods-12-01234-s001.zip]

Archive with 4 entries (4 files):
- Table S1_revised.pdf
- Table S2_revised.pdf
- Table S3.pdf
- Table S4.pdf
